# Supplementary material for: RBFOX1 Cooperates with MBNL1 to Control Splicing in Muscle, Including Events Altered in Myotonic Dystrophy Type 1
Source: PLOS journal article supplement (doi:10.1371/journal.pone.0107324), 2014-09-11
Supplement: S2 (10.1371/journal.pone.0107324.s002) [file journal.pone.0107324.s002]

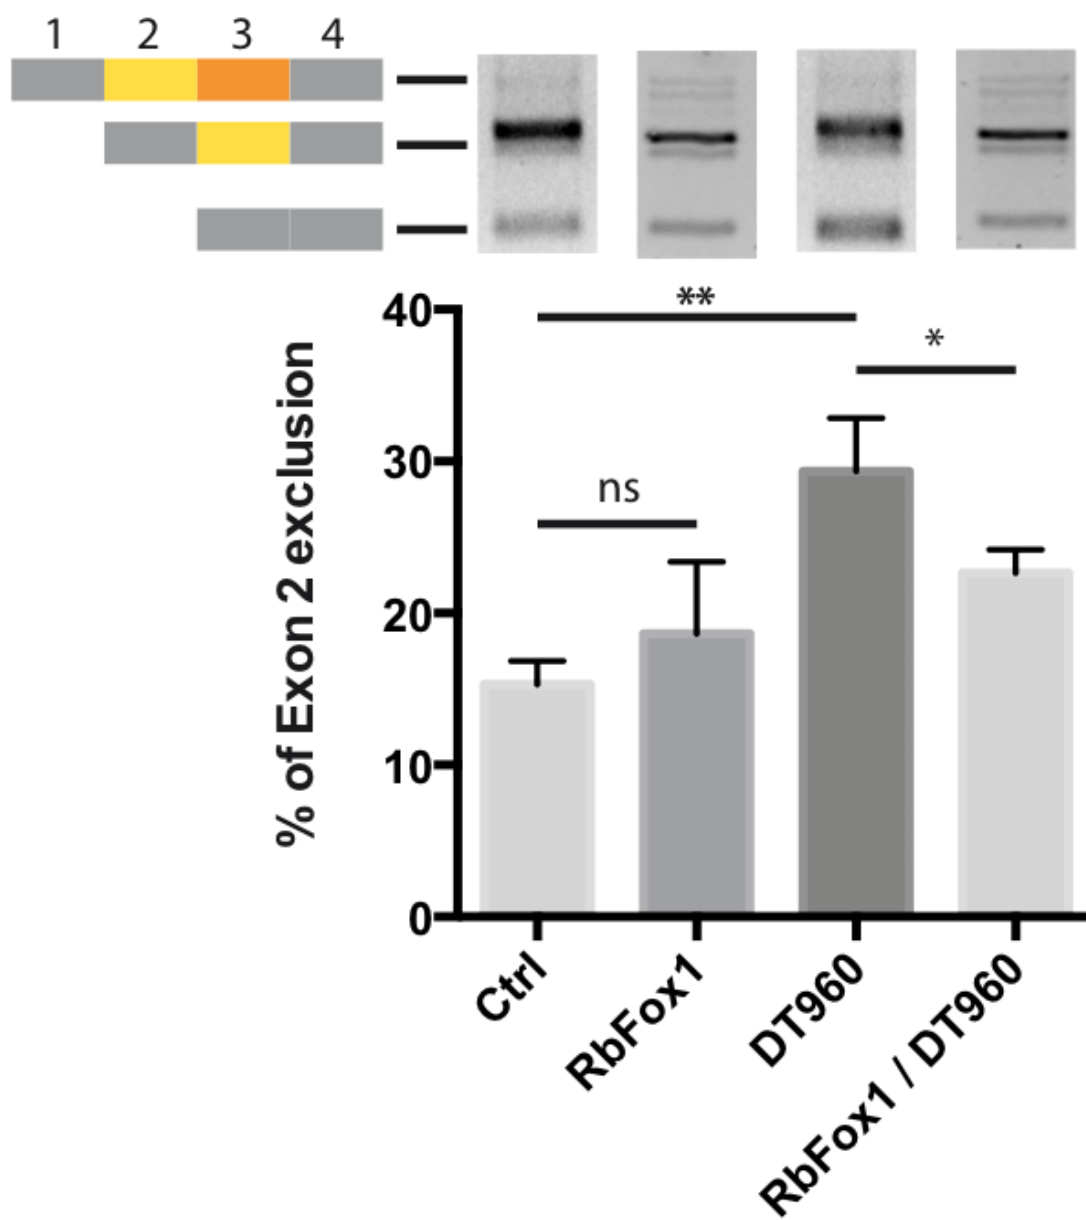

Supplementary Figure 2
